# Supplementary material for: Novel single-crystalline Hf1−xTixO2 1D nanostructures with room-temperature ferromagnetism
Source: Royal Society of Chemistry journal article supplement (doi:10.1039/d4tc01753f), 2024-01-01
Supplement: d4tc01753f1.pdf [file d4tc01753f1.pdf]

## Supporting Information

### Complementary GIXRD Analysis

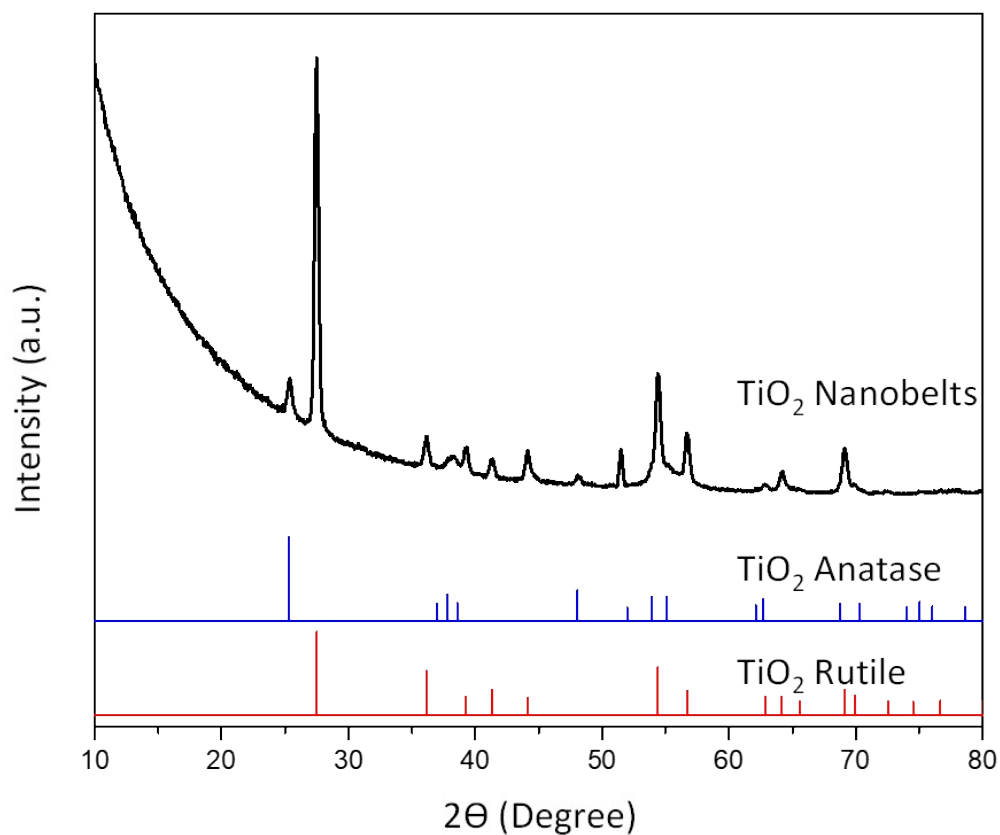

Figure S1. The GIXRD pattern of  $\text{TiO}_2$  nanobelts grown by catalyst-assisted PLD.

Table S1. Comparison of the position shifts of the two prominent (111) and (200) peaks in  $\text{Hf}_{1-x}\text{Ti}_x\text{O}_2$  nanospikes relative to their respective peaks in the undoped  $\text{HfO}_2$  NWs.

| Plane Index | $\text{HfO}_2$ Nanowires $2\theta$ (°) | $\text{Hf}_{0.99}\text{Ti}_{0.01}\text{O}_2$ Nanospikes |           | $\text{Hf}_{0.90}\text{Ti}_{0.10}\text{O}_2$ Nanospikes |           | $\text{Hf}_{0.75}\text{Ti}_{0.25}\text{O}_2$ Nanospikes |           |
|-------------|----------------------------------------|---------------------------------------------------------|-----------|---------------------------------------------------------|-----------|---------------------------------------------------------|-----------|
|             |                                        | $2\theta$ (°)                                           | Shift (°) | $2\theta$ (°)                                           | Shift (°) | $2\theta$ (°)                                           | Shift (°) |
| (1 1 1)     | 31.71                                  | 31.73                                                   | 0.02      | 31.80                                                   | 0.09      | 31.75                                                   | 0.04      |
| (2 0 0)     | 34.37                                  | 34.38                                                   | 0.01      | 34.44                                                   | 0.07      | 34.44                                                   | 0.07      |

## EDS Elemental Analysis of $\text{Hf}_{1-x}\text{Ti}_x\text{O}_2$ Nanospikes

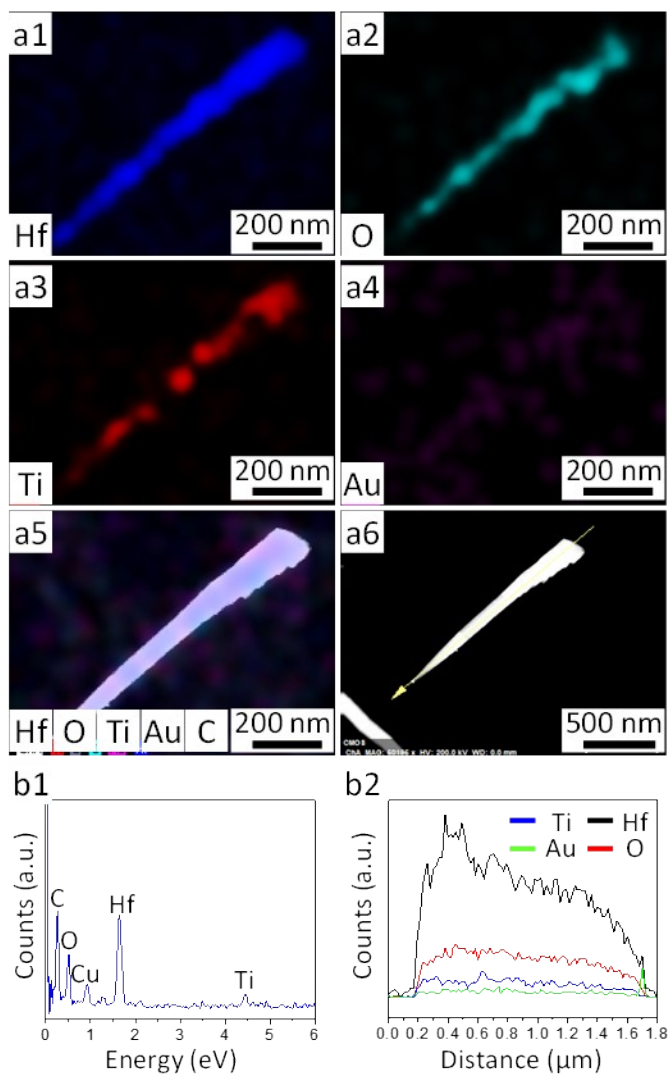

Figure S2. (a) STEM-EDS elemental maps for (a1) Hf, (a2) O, (a3) Ti, (a4) Au, and (a5) their overlaps of a  $\text{Hf}_{0.75}\text{Ti}_{0.25}\text{O}_2$  nanospike grown on a Sn-GNI/Ox-Si substrate at 770 °C, along with (a6) its STEM High-Angle Annular Dark Field (STEM-HAADF) image. The corresponding (b1) EDS spectrum of the elemental maps, and (b2) the EDS linescan profiles of Hf, O, Ti and Au along the nanospike marked in (a6).

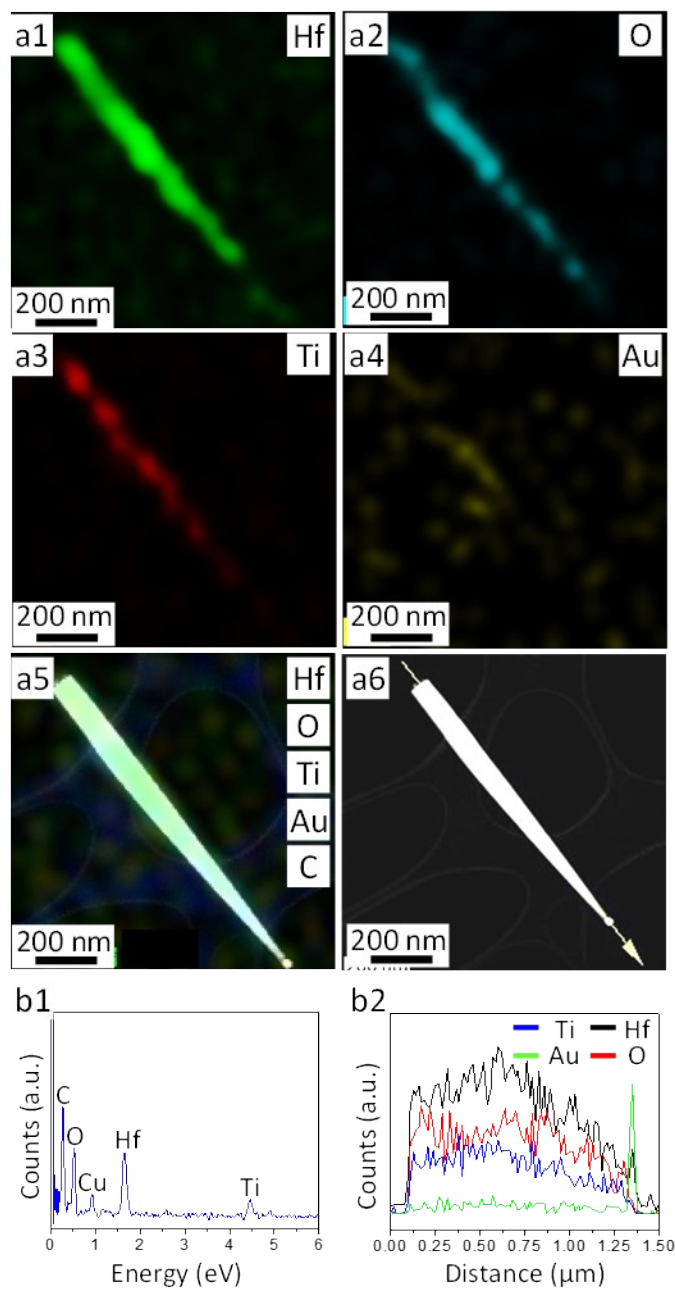

Figure S3. (a) STEM-EDS elemental maps for (a1) Hf, (a2) O, (a3) Ti, (a4) Au, and (a5) their overlaps of a  $\text{Hf}_{0.50}\text{Ti}_{0.50}\text{O}_2$  nanospike grown on a Sn-GNI/Ox-Si substrate at 770 °C, along with (a6) its STEM High-Angle Annular Dark Field (STEM-HAADF) image. The corresponding (b1) EDS spectrum of the elemental maps, and (b2) the EDS linescan profiles of Hf, O, Ti and Au along the nanospike marked in (a6).

## Comparison of Magnetic Properties of Hf<sub>1-x</sub>Ti<sub>x</sub>O<sub>2</sub> Nanostructures with Previous Studies on HfO<sub>2</sub> and ZrO<sub>2</sub>

Table S2. Comparison of magnetic properties of Hf<sub>1-x</sub>Ti<sub>x</sub>O<sub>2</sub> (0 ≤ x ≤ 1) nanostructures with those of ZrO<sub>2</sub> and HfO<sub>2</sub> in previous studies.

| Sample                                                                       | Measurement Temperature (K) | M <sub>s</sub> (emu/g)  | M <sub>r</sub> (emu/g) | H <sub>c</sub> (Oe) |
|------------------------------------------------------------------------------|-----------------------------|-------------------------|------------------------|---------------------|
| HfO <sub>2</sub> nanowires <sup>a</sup>                                      | 300                         | 1.2 × 10 <sup>-3</sup>  | 0.8 × 10 <sup>-4</sup> | 29                  |
|                                                                              | 2                           | 2.5 × 10 <sup>-3</sup>  | 2.0 × 10 <sup>-4</sup> | 160                 |
| Hf <sub>0.99</sub> Ti <sub>0.01</sub> O <sub>2</sub> nanospikes <sup>a</sup> | 300                         | 1.4 × 10 <sup>-3</sup>  | 3.2 × 10 <sup>-4</sup> | 312                 |
|                                                                              | 2                           | 4.2 × 10 <sup>-3</sup>  | 7.3 × 10 <sup>-4</sup> | 362                 |
| Hf <sub>0.90</sub> Ti <sub>0.10</sub> O <sub>2</sub> nanospikes <sup>a</sup> | 300                         | 2.3 × 10 <sup>-3</sup>  | 3.2 × 10 <sup>-4</sup> | 431                 |
|                                                                              | 2                           | 4.8 × 10 <sup>-3</sup>  | 7 × 10 <sup>-4</sup>   | 547                 |
| TiO <sub>2</sub> Nanobelts <sup>a</sup>                                      | 300                         | 3.9 × 10 <sup>-3</sup>  | 1.7 × 10 <sup>-3</sup> | 702                 |
|                                                                              | 2                           | 21.1 × 10 <sup>-3</sup> | 2.5 × 10 <sup>-3</sup> | 597                 |
| HfO <sub>2</sub> thin film <sup>1</sup>                                      | 300                         | 1-100.1                 | -                      | -                   |
| HfO <sub>2</sub> thin film <sup>2</sup>                                      | 300                         | 3                       | -                      | -                   |
| HfO <sub>2</sub> thin film <sup>3</sup>                                      | 300                         | 2                       | -                      | 115                 |
|                                                                              | 1.8                         | 5                       | -                      | -                   |
| HfO <sub>2</sub> colloidal nanorods <sup>4</sup>                             | 300                         | 1.3 × 10 <sup>-2</sup>  | -                      | 300                 |
|                                                                              | 10                          | 2.3 × 10 <sup>-2</sup>  | -                      | 50                  |
| ZrO <sub>2</sub> nanowires <sup>5</sup>                                      | 300                         | 5.9                     | 1.5                    | 99                  |
|                                                                              | 5                           | 8.5                     | 2                      | 100                 |
| ZrO <sub>2</sub> nanoclusters <sup>6</sup>                                   | 300                         | 1.8                     | 0.12                   | 77                  |
|                                                                              | 5                           | 1.9                     | 0.2                    | 120                 |

<sup>a</sup>This work.

## Surface Analysis

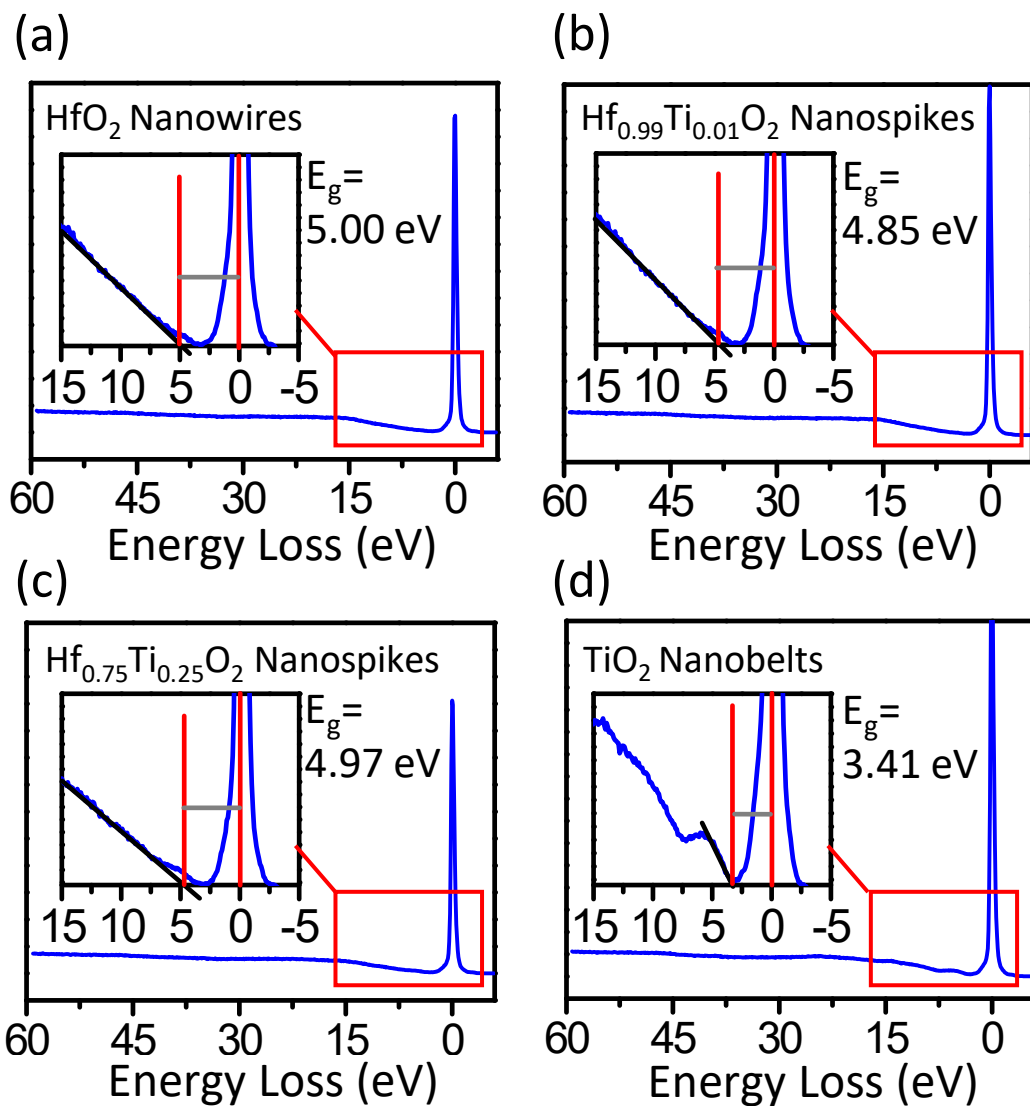

Figure S4. Electron energy loss spectra of (a)  $\text{HfO}_2$  nanowires, (b)  $\text{Hf}_{0.99}\text{Ti}_{0.01}\text{O}_2$  nanospikes, (c)  $\text{Hf}_{0.75}\text{Ti}_{0.25}\text{O}_2$  nanospikes and (d)  $\text{TiO}_2$  nanobelts. Insets show the determination of the bandgap by using linear fittings on the onsets of loss signal spectra.

### Additional Magnetization Measurements

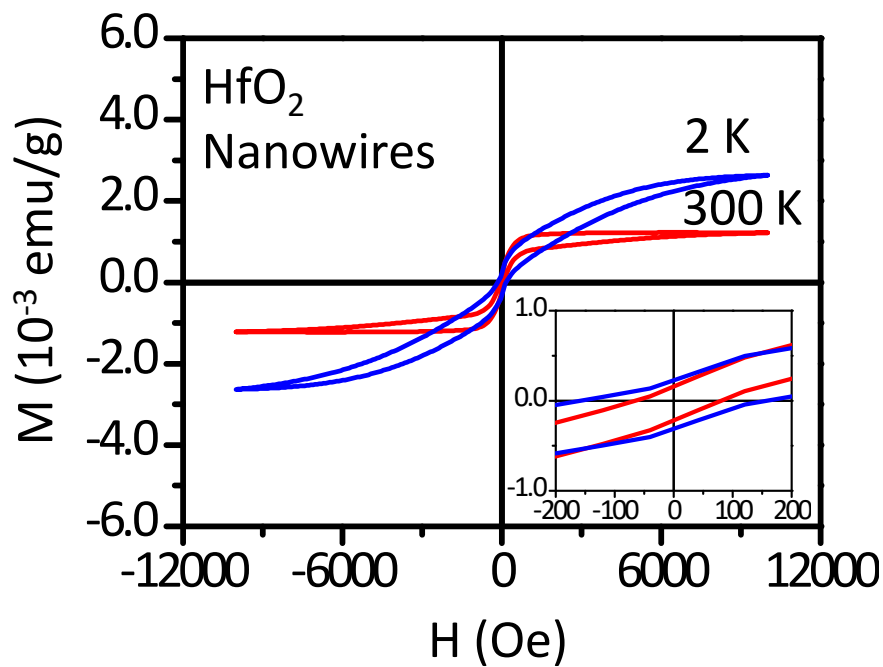

Figure S5. Magnetization ( $M$ ) as a function of applied magnetic field ( $H$ ) of undoped HfO<sub>2</sub> nanowires.<sup>7</sup>

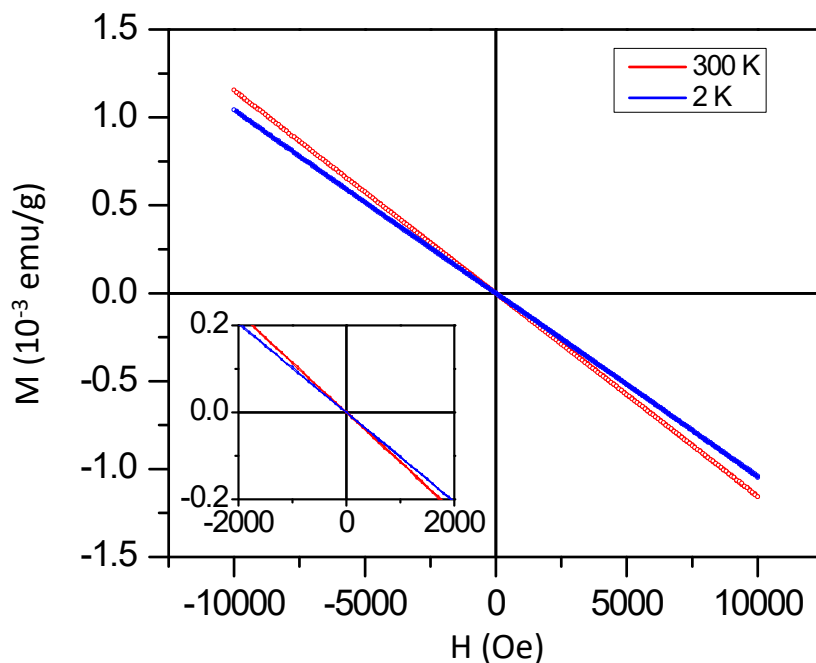

Figure S6. Magnetization ( $M$ ) as a function of the applied magnetic field ( $H$ ) of bare Si substrate, measured at 2 K and 300 K.

## Surface Analysis and Depth-profiling

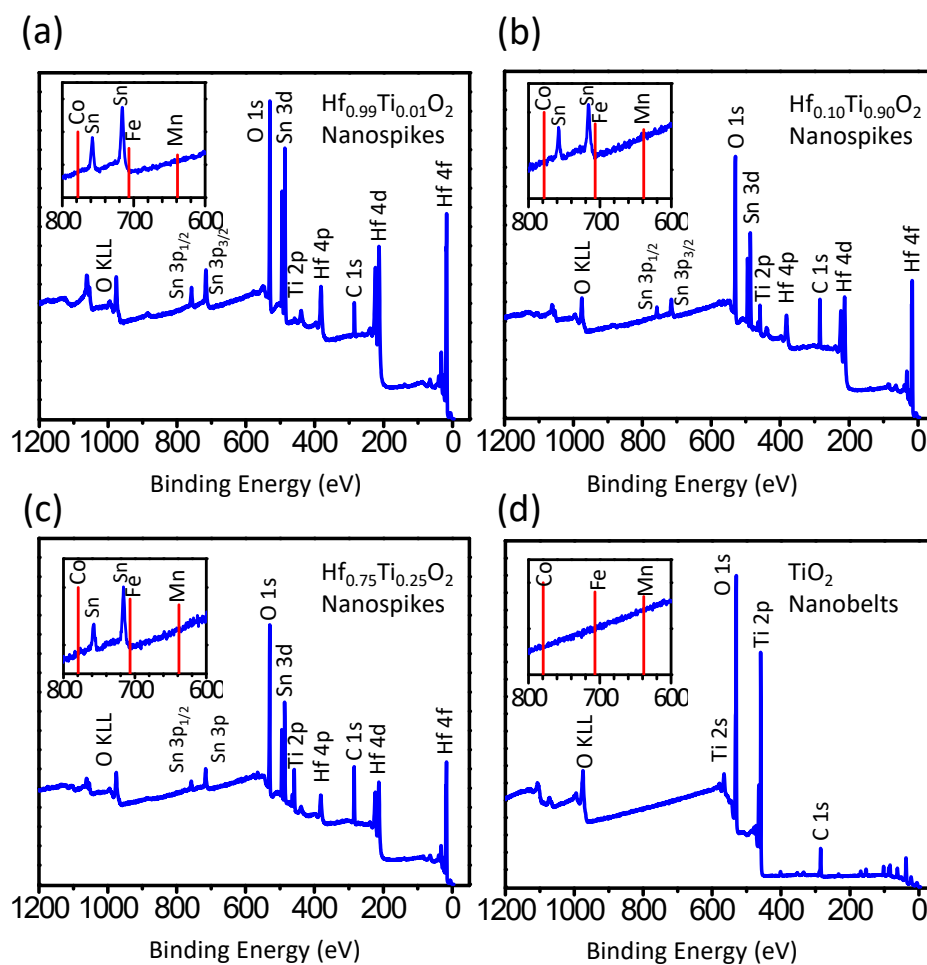

Figure S7. XPS survey spectra of (a)  $\text{Hf}_{0.99}\text{Ti}_{0.01}\text{O}_2$  nanospikes (b)  $\text{Hf}_{0.90}\text{Ti}_{0.10}\text{O}_2$  nanospikes (c)  $\text{Hf}_{0.75}\text{Ti}_{0.25}\text{O}_2$  nanospikes, and (d)  $\text{TiO}_2$  nanobelts. The insets show expanded views of the Mn, Fe and Co spectral regions.

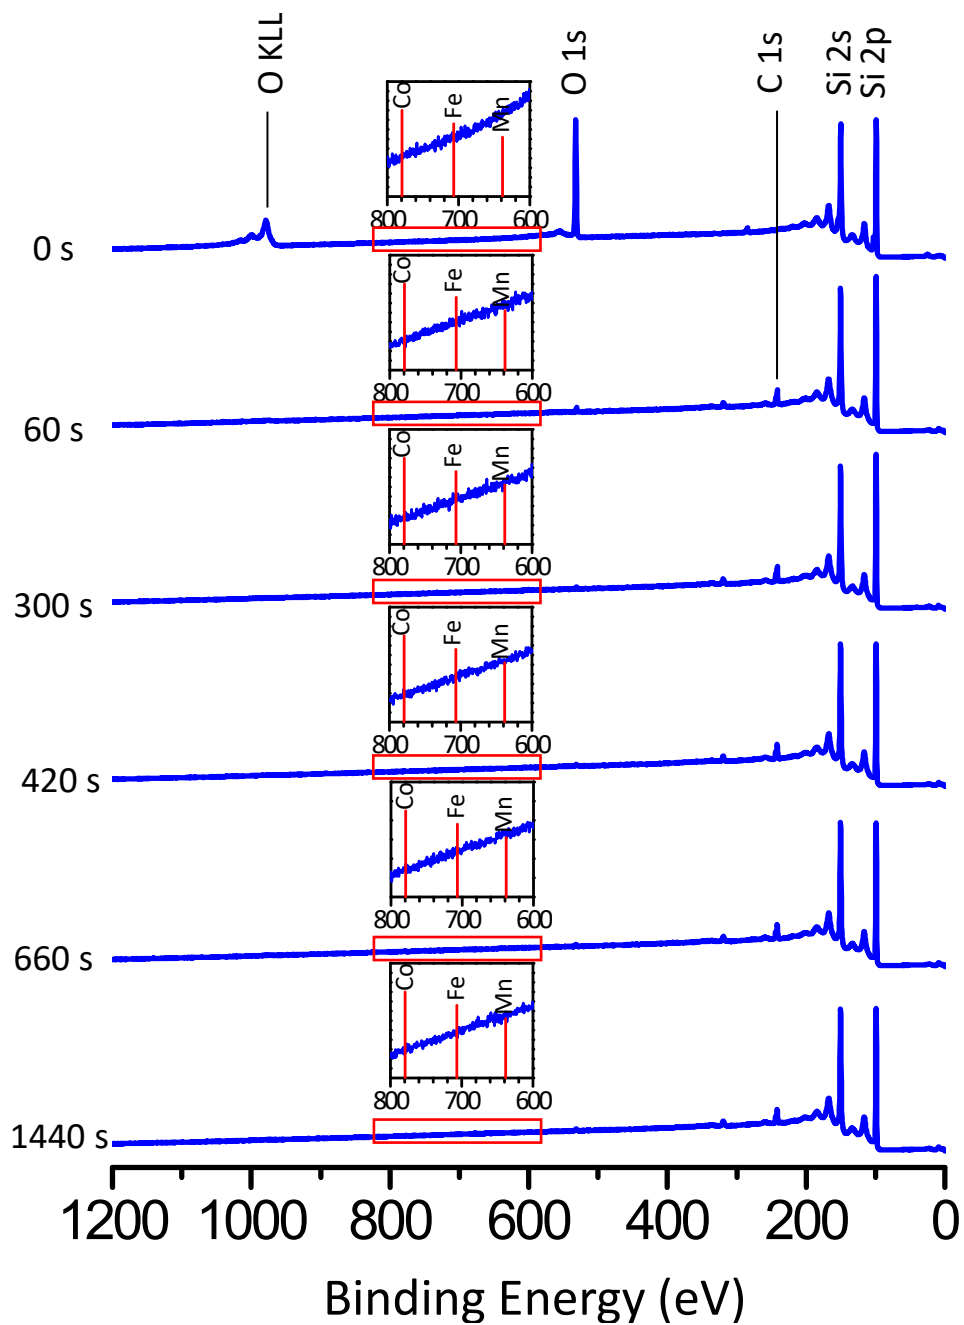

Figure S8. XPS depth-profiling survey spectra of the Si substrate with increasing Ar sputtering time. Insets show expanded views of the Mn, Fe, and Co spectral regions.



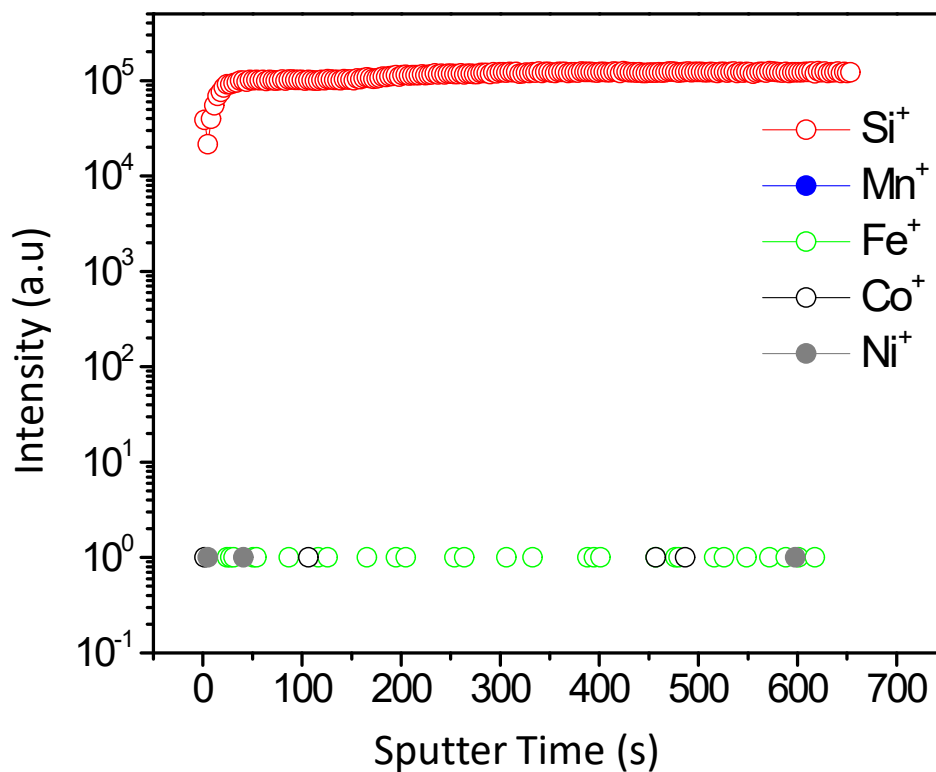

Figure S9. TOF-SIMS depth profile of the Si substrate during 700 s of Ar sputtering. With the exception of Si<sup>+</sup>, all the other ion signals are found to overlap with one another.

## References

- 1 J. M. D. Coey, M. Venkatesan, P. Stamenov, C. B. Fitzgerald and L. S. Dorneles, *Phys. Rev. B - Condens. Matter Mater. Phys.*, 2005, **72**, 024450.
- 2 N. H. Hong, J. Sakai, N. Poirot and V. Brizé, *Phys. Rev. B - Condens. Matter Mater. Phys.*, 2006, **73**, 132404.
- 3 K. K. Bharathi, S. Venkatesh, G. Prathiba, N. H. Kumar and C. V. Ramana, *J. Appl. Phys.*, 2011, **109**, 07C318.
- 4 E. Tirosh and G. Markovich, *Adv. Mater.*, 2007, **19**, 2608–2612.
- 5 M. A. Rahman, S. Rout, J. P. Thomas, D. McGillivray and K. T. Leung, *J. Am. Chem. Soc.*, 2016, **138**, 11896–11906.
- 6 X. Guan, S. Srivastava, J. P. Thomas, N. F. Heinig, J. S. Kang, M. A. Rahman and K. T. Leung, *ACS Appl. Mater. Interfaces*, 2020, **12**, 48998–49005.
- 7 M. Beedel, M. A. Rahman, H. Farkhondeh, J. P. Thomas, L. Zhang, N. F. Heinig and K. T. Leung, *Mater. Today Nano*, 2024, **28**, 100510.
